# Supplementary material
Source: publisher figshare collection journal article supplement (https://acs.figshare.com/ndownloader/files/15023078)
Supplement: Supplementary file 1 [file 15023078]

# Supporting Information

## Dehydrogenation of Isobutane over Ni-P/SiO<sub>2</sub> Catalyst: Effect of P Addition

Qingqing Zhu, Shan Zhang, Huanling Zhang, Guowei Wang\*, Xiaolin Zhu, and Chunyi Li\*

State Key Laboratory of Heavy Oil Processing, China University of Petroleum, Qingdao 266580, PR China

\*Corresponding authors: wangguowei@upc.edu.cn (G. Wang)

chyli@upc.edu.cn (C. Li)

---

\* Corresponding authors: wangguowei@upc.edu.cn (G. Wang); chyli@upc.edu.cn (C. Li)

## Contents

The principle and method of carbometer

## Figures

**Figure S1.** TG-DTA curves of deactivated 5Ni-P/SiO<sub>2</sub>-1.0 catalyst.

**Figure S2.** H<sub>2</sub>-TPR profiles of the precursors of 5Ni-P/SiO<sub>2</sub>-x catalyst.

**Figure S3.** NH<sub>3</sub>-TPD curve of 5Ni-P/SiO<sub>2</sub>-1.0 catalyst.

**Figure S4.** The geometry arrangements of Ni and P atoms in (a) Ni<sub>3</sub>P, (b) Ni<sub>12</sub>P<sub>5</sub>, and (c) Ni<sub>2</sub>P.

**Figure S5.** Real time MS spectra of isobutane dehydrogenation over 5Ni-P/SiO<sub>2</sub>-1.0 catalyst with time on stream (Reaction conditions: mass of catalyst: 1.0 g; gas flow: 20 mL min<sup>-1</sup>; isobutane partial pressure: 20 kPa; temperature: 600 °C).

**Figure S6.** TEM images of fresh (a) and deactivated (b) 5Ni-P/SiO<sub>2</sub>-1.0 catalysts.

## Tables

**Table S1** Quantitative results of NH<sub>3</sub>-TPD profiles of 5Ni-P/SiO<sub>2</sub>-a (a = 1.0, 0.5 and 0.3) catalysts.

**Table S2** Reaction results of isobutane on SiO<sub>2</sub> at different temperature.

**Table S3** Reaction results of isobutane over 5Ni/SiO<sub>2</sub> catalyst under different GHSV.

**Table S4** Reaction results of isobutane over P/SiO<sub>2</sub> catalyst.

**Table S5** Reaction results of isobutene passing through 5Ni-P/SiO<sub>2</sub>-1.0 catalyst at different temperature.

**Table S6** Reaction results of isobutene passing through 5Ni-P/SiO<sub>2</sub>-1.0 catalyst under different GHSV.

**Table S7** Assignment of the infrared spectrum of gaseous isobutane.

**Table S8** Assignment of the infrared spectrum of gaseous isobutene.

**Table S9** Pore properties of 5Ni-P/SiO<sub>2</sub>-1.0 catalyst before and after 120 min reaction.

**Table S10** The conversion of isobutane and selectivity to isobutene over 5Ni-P/SiO<sub>2</sub>, 5Ni-Sn/SiO<sub>2</sub> and

Ni-S/SiO<sub>2</sub> catalyst.

### The principle and method of carbometer

1HW(T) HF infrared absorption C/S instrument was applied to measure coke amount. The principle and method are described as follows. The procedure consists of coke combustion, gas purification, quantitative analysis of generated CO<sub>2</sub>, and determination of coke amount. CaCO<sub>3</sub> is used as a reference sample as it can be decomposed to CaO and CO<sub>2</sub> at high temperature. Fully dried CaCO<sub>3</sub> powders (50.0 mg) were loaded in a crucible, and the temperature was rapidly raised to 950 °C in order to ensure the complete decomposition of CaCO<sub>3</sub>. The signal of formed CO<sub>2</sub> (22.0 mg) was detected by infrared detector at the same time. The corresponding area of this signal is labeled as S. About 250 mg catalyst (m mg, accurately weighed) was put in another crucible, and it was heated to 950 °C under O<sub>2</sub> flow. The signal area of generated CO<sub>2</sub> was S<sub>C</sub>. The percentage of coke (w<sub>C</sub>) in the catalyst can be calculated by the following formula.

$$w_C = \frac{22.0 \times S_C \times 12}{m \times S \times 44} \times 100 wt\% \quad (1)$$

The final coke amount of the catalyst was calculated by the average value for more than three tests.

## Figures

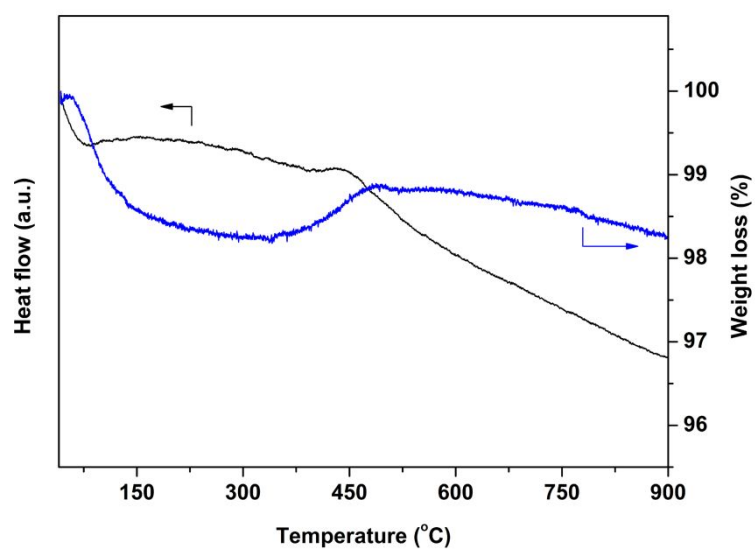

**Figure S1.** TG-DTA curves of deactivated 5Ni-P/SiO<sub>2</sub>-1.0 catalyst.

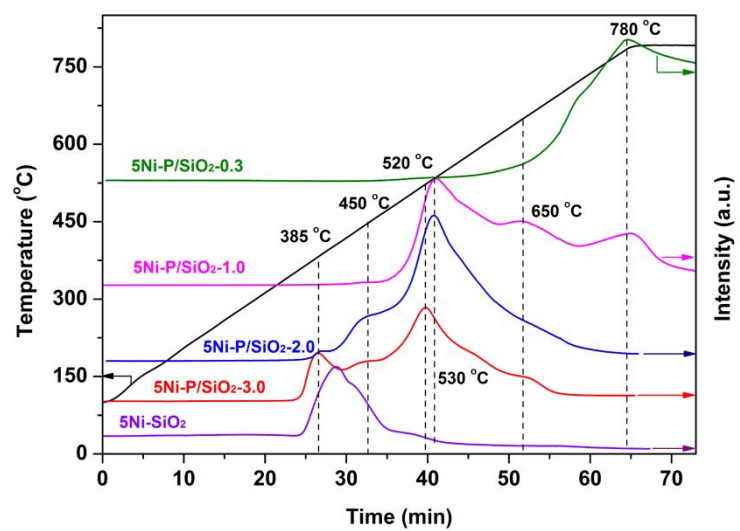

**Figure S2.** H<sub>2</sub>-TPR profiles of the precursors of 5Ni-P/SiO<sub>2</sub>-x catalyst.

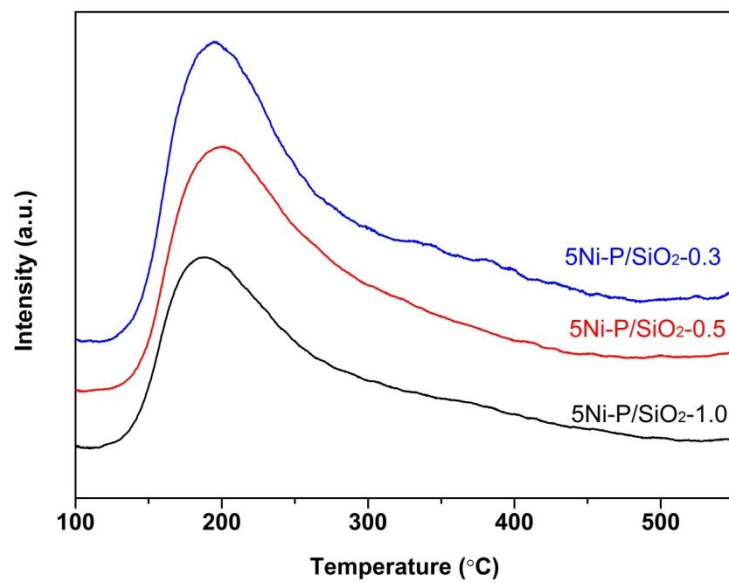

**Figure S3.** NH<sub>3</sub>-TPD curves of 5Ni-P/SiO<sub>2</sub>-1.0 catalyst.

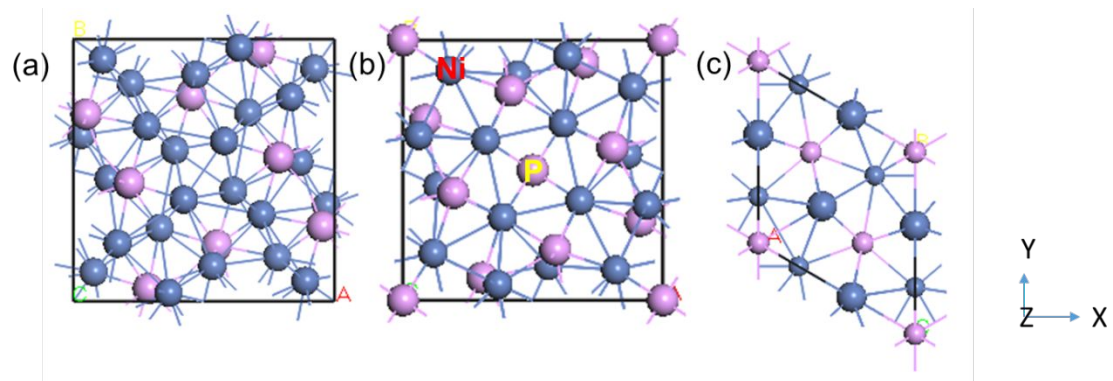

**Figure S4.** The geometry arrangements of Ni and P atoms in (a)  $\text{Ni}_3\text{P}$ , (b)  $\text{Ni}_{12}\text{P}_5$ , and (c)  $\text{Ni}_2\text{P}$ .



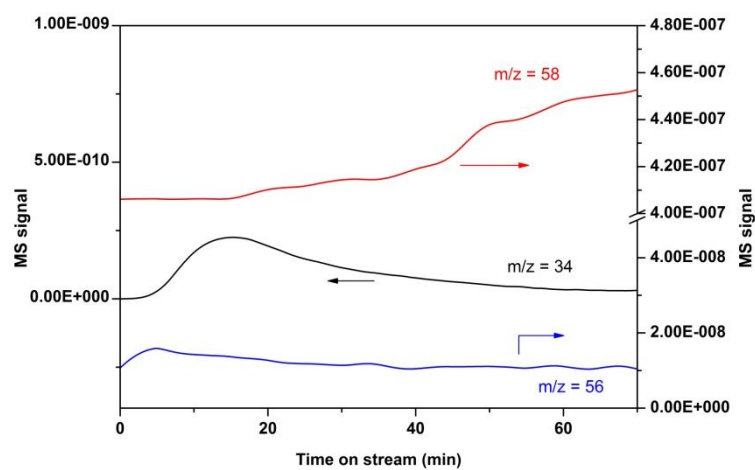

**Figure S5.** Real time MS spectra of isobutane dehydrogenation over 5Ni-P/SiO<sub>2</sub>-1.0 catalyst with time on stream (Reaction conditions: mass of catalyst: 1.0 g; gas flow: 20 mL min<sup>-1</sup>; isobutane partial pressure: 20 kPa; temperature: 600 °C).

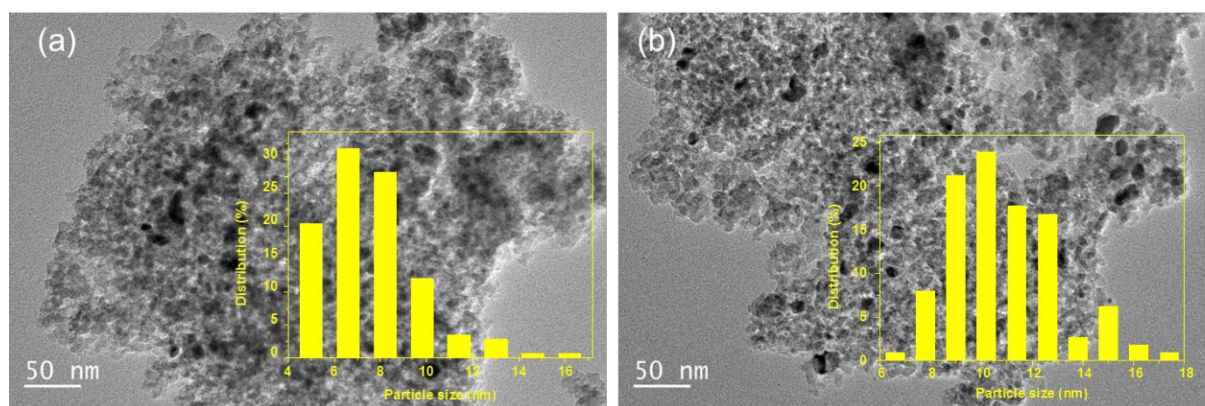

**Figure S6.** TEM images of fresh (a) and deactivated (b) 5Ni-P/SiO<sub>2</sub>-1.0 catalysts

## Tables

**Table S1** Quantitative results of NH<sub>3</sub>-TPD profiles of 5Ni-P/SiO<sub>2</sub>-a (a = 1.0, 0.5 and 0.3) catalysts

| Catalyst                    | Total acid sites (mmol g <sub>cat</sub> <sup>-1</sup> ) | Peak temperature (°C) |
|-----------------------------|---------------------------------------------------------|-----------------------|
| 5Ni-P/SiO <sub>2</sub> -1.0 | 0.28                                                    | 188                   |
| 5Ni-P/SiO <sub>2</sub> -0.5 | 0.41                                                    | 197                   |
| 5Ni-P/SiO <sub>2</sub> -0.3 | 0.48                                                    | 198                   |

**Table S2** Reaction results of isobutane on SiO<sub>2</sub> at different temperature.

|                |                   | Temperature (°C) |      |      |      |
|----------------|-------------------|------------------|------|------|------|
|                |                   | 560              | 580  | 600  | 620  |
| Conversion (%) |                   | 0.7              | 2.8  | 6.0  | 9.6  |
| Selectivity(%) | methane           | 7.6              | 15.0 | 14.8 | 20.1 |
|                | ethane            | 1.6              | 0.8  | 0.3  | 0.3  |
|                | ethene            | 0.7              | 0.5  | 1.0  | 1.9  |
|                | propane           | 27.5             | 9.8  | 3.6  | 2.7  |
|                | propene           | 19.1             | 32.2 | 33.8 | 37.7 |
|                | isobutene         | 43.6             | 41.8 | 46.5 | 37.3 |
|                | <i>n</i> -butenes | 0.0              | 0.0  | 0.0  | 0.0  |
|                | 1,3-butadiene     | 0.0              | 0.0  | 0.0  | 0.0  |

Reaction conditions: isobutane flow = 10 mL min<sup>-1</sup>, mass of SiO<sub>2</sub> = 2.0 g.

**Table S3** Gaseous product distribution of isobutane over 5Ni/SiO<sub>2</sub> catalyst under different GHSV.

|                 |                   | GHSV (h <sup>-1</sup> ) |      |
|-----------------|-------------------|-------------------------|------|
|                 |                   | 150                     | 1200 |
| Conversion (%)  |                   | 100                     | 20.3 |
| Selectivity (%) | methane           | 100                     | 98.3 |
|                 | ethane            | 0.0                     | 0.3  |
|                 | ethene            | 0.0                     | 0.0  |
|                 | propane           | 0.0                     | 0.6  |
|                 | propene           | 0.0                     | 0.0  |
|                 | isobutene         | 0.0                     | 0.9  |
|                 | <i>n</i> -butenes | 0.0                     | 0.0  |
|                 | 1,3-butadiene     | 0.0                     | 0.0  |

Reaction conditions: mass of catalyst = 2.0 g, temperature = 600 °C.

**Table S4** Reaction results of isobutane over P/SiO<sub>2</sub> catalyst.

|                |                   | P/SiO <sub>2</sub> |
|----------------|-------------------|--------------------|
| Conversion (%) |                   | 6.3                |
| Selectivity(%) | methane           | 9.2                |
|                | ethane            | 0.3                |
|                | ethene            | 0.7                |
|                | propane           | 3.9                |
|                | propene           | 24.9               |
|                | isobutene         | 55.3               |
|                | <i>n</i> -butenes | 5.4                |
|                | 1,3-butadiene     | 0.2                |

Reaction conditions: temperature = 600 °C, mass of catalyst = 2.0 g, GHSV = 150 h<sup>-1</sup>

**Table S5** Reaction results of isobutene passing through 5Ni-P/SiO<sub>2</sub>-1.0 catalyst at different temperature.

|                |                   | Temperature (°C) |      |      |
|----------------|-------------------|------------------|------|------|
|                |                   | 560              | 580  | 600  |
| Conversion (%) |                   | 19.0             | 21.8 | 25.2 |
|                | C6+               | 0.1              | 0.1  | 0.2  |
|                | methane           | 1.7              | 2.4  | 3.2  |
|                | ethane            | 0.2              | 0.2  | 0.3  |
|                | ethene            | 0.7              | 0.8  | 1.1  |
|                | propane           | 0.1              | 0.2  | 0.2  |
|                | propene           | 3.6              | 4.6  | 5.7  |
| Percent(%)     | isobutane         | 3.2              | 3.7  | 4.4  |
|                | <i>n</i> -butane  | 3.2              | 3.7  | 4.4  |
|                | <i>n</i> -butenes | 0.1              | 0.1  | 0.1  |
|                | isobutene         | 81.0             | 78.2 | 74.8 |
|                | 1,3-butadiene     | 5.5              | 5.4  | 5.0  |
|                | C5                | 0.5              | 0.5  | 0.6  |

Reaction conditions: mass of catalyst = 2.0 g, GHSV = 150 h<sup>-1</sup>.

**Table S6** Reaction results of isobutene passing through 5Ni-P/SiO<sub>2</sub>-1.0 catalyst under different GHSV.

|                |                   | GHSV (h <sup>-1</sup> ) |      |      |      |
|----------------|-------------------|-------------------------|------|------|------|
|                |                   | 90                      | 120  | 150  | 180  |
| Conversion (%) |                   | 37.5                    | 29.3 | 25.2 | 20.9 |
|                | C6+               | 0.2                     | 0.1  | 0.2  | 0.2  |
|                | methane           | 5.8                     | 4.0  | 3.2  | 2.7  |
|                | ethane            | 0.7                     | 0.4  | 0.3  | 0.2  |
|                | ethene            | 1.7                     | 1.2  | 1.1  | 0.8  |
|                | propane           | 0.7                     | 0.4  | 0.2  | 0.1  |
|                | propene           | 8.6                     | 6.4  | 5.7  | 4.8  |
| Percent (%)    | isobutane         | 5.8                     | 5.0  | 4.4  | 3.6  |
|                | <i>n</i> -butane  | 5.8                     | 5.0  | 4.4  | 3.6  |
|                | isobutene         | 0.8                     | 0.3  | 0.1  | 0.1  |
|                | <i>n</i> -butenes | 62.5                    | 70.7 | 74.8 | 79.1 |
|                | 1,3-butadiene     | 6.6                     | 5.9  | 5.0  | 4.2  |
|                | C5                | 0.8                     | 0.6  | 0.6  | 0.5  |

Reaction conditions: Temperature = 600 °C, mass of catalyst = 2.0 g.



**Table S7** Assignment of the infrared spectrum of gaseous isobutane.

| Assignment                                  | Wavenumber (cm <sup>-1</sup> ) |
|---------------------------------------------|--------------------------------|
| $\nu_a(\text{CH}_3)$                        | 2978, 2966, 2952               |
| $\nu_s(\text{CH}_3)$                        | 2879, 2870                     |
| $\nu_{(\text{C-H})}(\text{methylidyne})$    | 2892                           |
| $\delta_{as}(\text{CH}_3)$                  | 1490, 1477, 1464               |
| $\delta_{sy}(\text{CH}_3)$                  | 1395, 1380, 1365               |
| $\delta_{(\text{C-H})}(\text{methylidyne})$ | 1334                           |
| $\nu_{(\text{C-C})}$                        | 1177                           |

**Table S8** Assignment of the infrared spectrum of gaseous isobutene.

| Assignment                                    | Wavenumber (cm <sup>-1</sup> )           |
|-----------------------------------------------|------------------------------------------|
| $\nu_{\text{asym}}(\text{C-H})(=\text{CH}_2)$ | 3097, 3087, 3077                         |
| $\nu_{(\text{C-H})}(-\text{CH}_3)$            | 2990, 2979, 2968, 2944, 2927, 2893, 2865 |
| $\nu(\text{C}=\text{C})$                      | 1660                                     |
| $\delta_{(\text{C-H})}(-\text{CH}_3)$         | 1469, 1459, 1446, 1393, 1380, 1373       |
| $=\text{CH}_2$ in plane bend                  | 1291, 1281, 1271                         |
| $\nu(\text{C}-\text{C})$                      | 1067, 1054                               |
| $=\text{CH}_2$ twist                          | 990                                      |

**Table S9** Pore properties of fresh and deactivated (after 120 min reaction) 5Ni-P/SiO<sub>2</sub>-1.0 catalyst.

| Catalyst                                   | BET surface area<br>(m <sup>2</sup> g <sup>-1</sup> ) | Pore diameter<br>(nm) | Pore volume<br>(cm <sup>3</sup> g <sup>-1</sup> ) |
|--------------------------------------------|-------------------------------------------------------|-----------------------|---------------------------------------------------|
| Fresh<br>5Ni-P/SiO <sub>2</sub> -1.0       | 265.5                                                 | 7.1                   | 0.7                                               |
| Deactivated<br>5Ni-P/SiO <sub>2</sub> -1.0 | 263.7                                                 | 7.5                   | 0.7                                               |

**Table S10** The conversion of isobutane and selectivity to isobutene over 5Ni-P/SiO<sub>2</sub>, 5Ni-Sn/SiO<sub>2</sub> and

| Ni-S/SiO <sub>2</sub> catalyst.        |                          |                           |
|----------------------------------------|--------------------------|---------------------------|
| Catalyst                               | Isobutane conversion (%) | Isobutene selectivity (%) |
| Ni-S/SiO <sub>2</sub> <sup>[a]</sup>   | 67.0                     | 87.6                      |
| 5Ni-P/SiO <sub>2</sub> <sup>[b]</sup>  | 11.6                     | 86.2                      |
| 5Ni-Sn/SiO <sub>2</sub> <sup>[b]</sup> | 10.1                     | 94.2                      |

Reaction conditions: [a] mass of catalyst: 4.0 g; 14.3 vol % isobutane in N<sub>2</sub> at a total flow rate of 14 mL

min<sup>-1</sup>; [b] mass of catalyst: 2.0 g, isobutane flow rate of 10 mL min<sup>-1</sup> without N<sub>2</sub>.
